# Supplementary material
Source: Royal Society of Chemistry journal article supplement (doi:10.1039/d6tb00953k)
Supplement: d6tb00953k1.pdf [file d6tb00953k1.pdf]

## Supporting Information

### Dissolving Microneedles Loaded with Chitosan Oligosaccharides and Gallic Acid-Modified $\epsilon$ -Poly-L-lysine for the combined Antibacterial and Anti-inflammatory Therapy of Acne Vulgaris

#### Supporting Information 1

Calculation method. Elemental analyses (EA, Vario EL Cube, Elementar) were used to determine the degree of substitution (DS) of GA onto EPL [1, 2]. Carbon, hydrogen and nitrogen contents were measured for EPL and EPL-GA. The degree of substitution (DS) was calculated according to the following equation:

$$DS (\%) = \left| \frac{M_C - \%C \times M_{unit}}{M_{grafted} \times \%C - M_{C, grafted}} \right| \times 100\% \quad (1)$$

$$DS (mmol/g) = \frac{\%DS \times \%C}{M_C + M_{C, grafted}} \times 1000 \quad (2)$$

where %C is the relative carbon content in the sample.  $M_C$ ,  $M_{unit}$ ,  $M_{grafted}$  and  $M_{C, grafted}$  correspond to the carbon mass of EPL unit, the molecular mass of EPL unit, the molecular mass of GA residue and the carbon mass of GA residue, respectively.

#### Supporting Information 2

Table 1 Detailed compositions of CEGP MNs in 5 mL deionized water

| Sample          | PVA (15%, w/v) | COS    | EPL-GA |
|-----------------|----------------|--------|--------|
| PVA MNs         | 750 mg         | 0 mg   | 0 mg   |
| COS/PVA MNs     | 750 mg         | 100 mg | 0 mg   |
| EPL-GA/PVA NMNs | 750 mg         | 0 mg   | 100 mg |
| CEGP MNs        | 750 mg         | 100 mg | 100 mg |

### Supporting Information 3

Table 2 qRT-PCR primers

| Primer         | Primers sequence (5' to 3') |
|----------------|-----------------------------|
| TNF-a F        | GATCGGTCCCCAAAGGGATG        |
| TNF-a R        | TTTGCTACGACGTGGGCTAC        |
| IL-6 F         | AGCCAGAGTCCTTCAGAGAGAT      |
| IL-6 R         | AGGAGAGCATTGGAAATTGGGG      |
| VEGF F         | GCAGGCTGCTGTAACGATGA        |
| VEGF R         | GCTCACAGTGATTTTCTGGCTT      |
| IL-1 $\beta$ F | ATGCCACCTTTTGACAGTGATG      |
| IL-1 $\beta$ R | TGTGCTGCTGCGAGATTGA         |
| IL-10 F        | CCTGGGTGAGAAGCTGAAGAC       |
| IL-10 R        | CTTGTAGACACCTTGGTCTTGG      |
| GAPDH F        | GGAGAGTGTTTCCTCGTCCC        |
| GAPDH R        | ATGAAGGGGTCGTTGATGGC        |

### Supporting Information 4

Table 3 Calculation of the degree of substitution based on elemental analyses (%w/w) data of EPL and EPL-GA

| Sample  | N (%)  | C (%)  | H (%) | DS (%)   | DS (mmol/g)       |
|---------|--------|--------|-------|----------|-------------------|
| EPL1    | 14.967 | 38.684 | 8.531 | /        | /                 |
| EPL2    | 15.035 | 38.827 | 8.361 | /        | /                 |
| EPL3    | 15.054 | 38.768 | 8.095 | /        | /                 |
| EPL-GA1 | 13.567 | 39.899 | 7.782 | 39.48286 |                   |
| EPL-GA2 | 13.064 | 39.022 | 7.830 | 44.32851 | 1.027 $\pm$ 0.061 |
| EPL-GA3 | 13.482 | 40.252 | 7.769 | 37.26953 |                   |

### Supporting Information 5

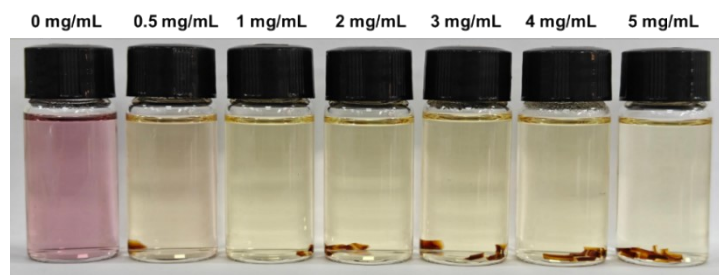

Figure S1. Photos showing the DPPH scavenging effects of CEGP MNs.

### Supporting Information 6

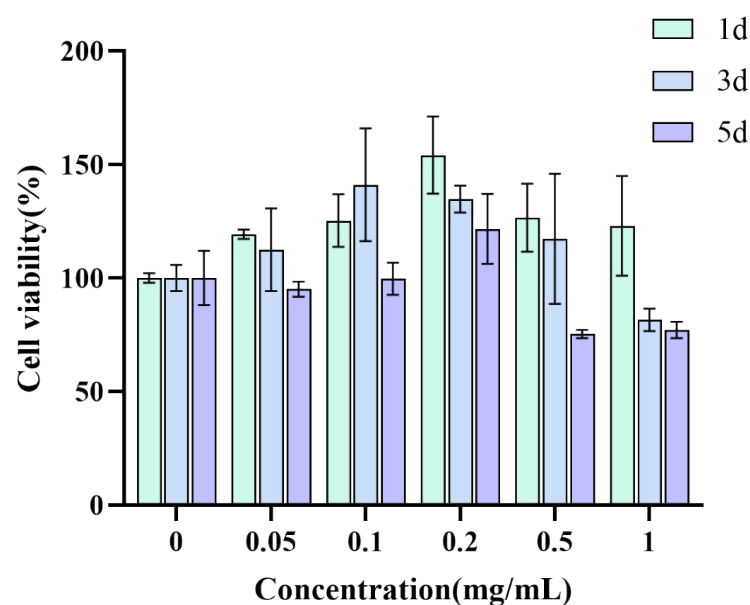

Figure S2. Cell viability of L929 cells after co-culture with different CEGP extraction concentrations.

### Supporting Information 7

A 50  $\mu$ L of *P. acnes* suspension ( $\sim 10^8$  CFU/mL) was administered via intradermal injection into the dermis of mice (Figure S3). After 24 h post-injection, localized swelling and erythema developed at the injection site. At this time point, a second intradermal injection of 50  $\mu$ L *P. acnes* suspension ( $\sim 10^8$  CFU) was administered; after another 24 h, distinct acneiform pustules had formed (Figure 6c). The mice were then

randomly assigned to different treatment groups.

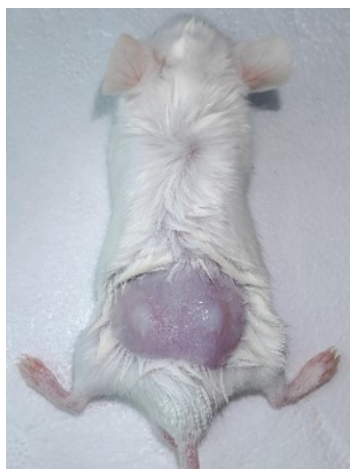

Figure S3. Photo shows wheals induced by injecting *P. acnes* suspension into the epidermis of mice.

## References

- [1] M. Krouit, J. Bras, M.N. Belgacem, Cellulose surface grafting with polycaprolactone by heterogeneous click-chemistry, *European Polymer Journal* 44(12) (2008) 4074-4081.
- [2] K. Missoum, M.N. Belgacem, J.P. Barnes, et al., Nanofibrillated cellulose surface grafting in ionic liquid, *Soft Matter* 8(32) (2012) 8338-8349.
